# Supplementary material for: Hospital choice in Germany from the patient’s perspective: a cross-sectional study
Source: Springer Nature journal article supplement (doi:10.1186/s12913-017-2712-3), 2017-11-13
Supplement: MOESM1 [file 15220288]

KH: \_\_\_\_, FA: \_\_\_\_, Sub-FA: \_\_\_\_\_, PC: \_\_\_\_

### Questionnaire on hospital choice

**1. How often have you been hospitalised (inpatient) before this hospital admission? (Regardless in which hospital.)**

- never (0 times)       1 to 5 times       more than 5 times       don't know

**2. When was your last inpatient stay in a hospital?**

- it is my first inpatient stay in a hospital  
 within the last 12 months  
 more than 12 months ago  
 don't know

**3. What were the main reasons and decision criteria to come to choose this hospital? Please list your key points:**

---

---

**4. Have you been hospitalised as inpatient in this hospital before??**

- yes                       no                       don't know

**4a. If yes: Have you been as well in this hospital department before?**

- yes                       no                       don't know

**5. If you have been hospitalised as inpatient in this hospital before, how satisfied have you been with your stay back then?**

- I can't answer this question, it is my first stay in this hospital  
 very satisfied  
 satisfied  
 less satisfied  
 not satisfied  
 don't know

**6. Have you sought for information about this hospital by relatives or friends before admission?**

- yes                       no                       don't know

**7. Do you, relatives or friends of yours work in this hospital?**

- yes                       no                       don't know

**8. How far is this hospital away from home?**

**8a. Please specify what type of transportation you would typically take to come to this hospital.**

- car, motorcycle
- public transportation (bus, train, tram, subway) or by taxi
- bicycle
- walking
- don't know

**8b. How long does it take to get to the hospital from home? Please give the time necessary in minutes.**

\_\_\_\_\_ minutes

**9. Is there a hospital that could treat you with your current complaints as well and that you could reach as fast or even faster or with less effort from home?**

- yes                       no                       don't know

**9a. If yes: Why haven't you chosen that hospital instead?  
Please list your key points:**

---

---

**10. What type of transportation do your most important relatives usually take to visit you here in the hospital?**

- car, motorcycle
- public transportation (bus, train, tram, subway) or by taxi
- bicycle
- walking
- I do not get visitors
- don't know

**10a. How long do your most important relatives need to get to the hospital?  
Please give the time necessary in minutes.**

\_\_\_\_\_ minutes

**11. Did you have an appointment for this admission?**

- yes                       no                       don't know

**11a If yes: Who made the appointment with the hospital??**

- I myself
- primary care doctor
- specialist doctor
- doctor of the hospital polyclinic
- relative
- other (please state): \_\_\_\_\_

**12. Who admitted you to the hospital?**

- I myself
- primary care doctor (or his/her substitute)
- specialist doctor (or his/her substitute)
- primary care doctor or his/her substitute
- hospital policlinic
- emergency service
- other (please state): \_\_\_\_\_

**13. Who decided on admission to this hospital?**

- I decided myself
- primary care doctor
- specialist doctor
- hospital policlinic
- emergency service
- relative
- other (please state): \_\_\_\_\_

**14. Do you – or somebody else- have chosen for this admission between two or more hospitals?**

- yes                       no                       don't know

**15. How satisfied are you with your participation in choosing the hospital for this admission?**

- very satisfied
- satisfied
- less satisfied
- not satisfied
- don't know

**16. How much time before admission day did you know that you needed an inpatient stay in a hospital?**

- I was admitted the same day.
- I was admitted the following day.
- 2 to 7 days before admission
- 1 to 4 weeks before admission
- more than 4 weeks before admission
- don't know

**17. About how many hospitals have you sought information before this admission?**

- about none hospital
- only about this hospital
- about this and other hospitals
- only about other hospitals
- don't know

**18. Did you have enough time before admission to inform yourself about hospitals?**

- yes                       no                       don't know  
 I did not have to seek information since I already knew this hospital.

**19. How much time do you need round about before an admission to get information on a hospital you do not know yet in order to make your choice?**

about \_\_\_\_\_ days

- don't know

**20. Where [or by whom] in fact have you sought for information on hospitals before admission to make your choice?**

**Please mark all items that apply. (Multiple answers possible.)**

- a I did not need to seek for information since I already knew the hospital from a previous stay.  
 b I did not seek any information before admission.  
 c from my primary care doctor  
 d from my specialist doctor  
 e in the hospital polyclinic  
 f from my relatives and friends  
 g from a hospital information event  
 h from the Internet (myself or somebody else)  
 i from information brochures  
 k from daily newspapers  
 l from health insurance fund  
 m from patient associations  
 n from support groups  
 o from consumer advice services  
 p from a personal inspection of the hospital  
 q other information sources: (please state): \_\_\_\_\_
- 

**21. Please return to the last question above and circle the ONE marked item that was the most important source of information for you. (When you marked only one item you do not need to circle the most important one.)**

**22. Which decision criteria have been important for you to choose now this hospital?**

**Please mark those items that were in fact important to you in choosing this hospital. (Multiple answers possible.)**

a None, since I did not choose the hospital.

**For my admission to this hospital it was important....**

b how my own personal experience was with this hospital through previous hospitalisation in here.

c whether patients are included in treatment decisions

d whether physicians take enough time for patients

e whether my relatives or friends recommended this hospital to me

f whether my outpatient doctors (primary care doctor or specialist) recommended this hospital to me

g whether the hospital has a good reputation

h how other patients rate the hospital in a satisfaction survey

i how the hospital can be accessed by public transport

k how far the hospital is from home

l how long waiting times are up to admission

m whether medical-technical equipment is state-of-the-art

n how many patients die in the intervention I require

o how are treatment success records for my type of intervention

p how often complications occur after the intervention I require

q whether the hospital adheres to medical guidelines

r how often the hospital performs my type of intervention

s how often infections occur among patients of this hospital

t whether the hospital adheres to all rules of hygiene

u other reasons: \_\_\_\_\_

**23. If you have to inform yourself on a hospital, from whom would you like to get the information??**

**Please mark the items most important to you. (Multiple answers possible.)**

a from my primary care doctor

b from my specialist doctor

c directly from the hospitals in which I am interested in

d from websites that compare information on hospitals

e from consumer advice services

f from health insurance fund

g from patient associations

h from support groups

i from my relatives, friends, or colleagues

k from independent information centres for patients

l from hospital federations

m from others (please state): \_\_\_\_\_

**24. How often do you use the Internet on average?**

- never
- less than once a month
- at least once a month
- at least once a week
- (almost) every day

**25. With which doctor(s) have you talked before admission about the treatment details?**

**(Multiple answers possible.)**

- a with none
- b primary care doctor
- c specialist
- d hospital polyclinic
- e other (please state): \_\_\_\_\_

Before patients agree upon a treatment they can get an examination by a second doctor besides the primary care doctor or the specialist. By this they can get an extra opinion and recommendation for the planned treatment. This is called to get a second opinion or “second opinion procedure”.

**26. Did you get a second opinion before this hospital treatment?**

- yes
- no
- don't know

**27. Did you asked for a second opinion prior to a medical treatment before?**

- yes
- no
- don't know

**28. Did you wish for a second opinion before this hospital treatment?**

- yes
- no
- don't know

**29. Do you know how to get a second opinion?**

- yes
- no
- don't know

**30. Do you have a long lasting, chronic disease, or more?** Note: Chronic diseases are long lasting illnesses needing constant treatment and controls, for example diabetes or heart diseases.

- yes
- no
- don't know

**30a. If yes: Since when do you have the (first) chronic disease?**

- up to 1 year
- since 1 to 5 years
- more than 5 years

**31. Is your current hospital stay due to a chronic disease? (diagnostics or treatment)**

- yes                                       no                                       don't know

**32. Have you ever gotten the diagnosis of one or more of the following diseases by a doctor? Please mark all applicable diseases and state on the right how many years ago you got the diagnosis.**

|                            |                                                                                                                                                  | <b>...years ago</b> |
|----------------------------|--------------------------------------------------------------------------------------------------------------------------------------------------|---------------------|
| <input type="checkbox"/> a | cardiovascular disease (high blood pressure, disturbed cardiac blood flow, angina pectoris, coronary, chronic heart failure, cardiac arrhythmia) |                     |
| <input type="checkbox"/> b | stroke or disturbed cerebral blood flow                                                                                                          |                     |
| <input type="checkbox"/> c | chronic bronchitis, bronchial asthma                                                                                                             |                     |
| <input type="checkbox"/> d | diabetes mellitus                                                                                                                                |                     |
| <input type="checkbox"/> e | cancer, malignant tumour                                                                                                                         |                     |
| <input type="checkbox"/> f | arthropathy (joint wear and tear/ arthrosis, inflammatory arthropathy / rheumatoid arthritis, rheumatism)                                        |                     |
| <input type="checkbox"/> g | backache                                                                                                                                         |                     |
| <input type="checkbox"/> h | epilepsy, Parkinson's disease, multiple sclerosis                                                                                                |                     |
| <input type="checkbox"/> i | depression                                                                                                                                       |                     |
| <input type="checkbox"/> k | anxiety disorder, alcoholic disease, schizophrenia                                                                                               |                     |
| <input type="checkbox"/> l | other chronic disease (please state):<br>_____                                                                                                   |                     |

**33. Do you currently take any drug regularly and for more than 6 months?**

- yes                                       no                                       don't know

**34. Do you have any disability that is officially recognised by the office for disabled?**

- yes                                       no                                       don't know

**34a. If yes: What is the current degree of disability?**

\_\_\_\_\_ % (per cent)                                       don't know

**35. Do you have a loss in earning capacity (ECR) recognised by the Statutory accident Insurance?**

- yes                                       no                                       don't know

**35a. If yes: What is the current degree of reduction?**

\_\_\_\_\_ % (per cent)                                       don't know

**36. Do you have any need for a long-term care that is recognised by the Statutory Long-term Care Insurance?**

- yes                       no                       don't know

**If yes: 36a. What level of care do you have?**

- level of care:     I (1)         II (2)         III (3)         don't know

**37. What is your health care insurance?**

- statutory health care insurance  
 statutory health care insurance AND private supplementary insurance  
 private health insurance  
 state benefit insurance  
 other: (for example: no health insurance, self-payer)  
 don't know

**38. Year of birth:** 19

**39. Your sex:**                       male                       female

**40. Since when do you mainly live in Germany?**

since birth                      since:  (year)

**41. Do you have:**

- the German citizenship                       yes  
permanent residency status                       yes  
temporary residency status                       yes

**42. In which country were your parents born?**

mother:     in Germany                      in another country: which ? \_\_\_\_\_  
father:     in Germany                      in another country: which ? \_\_\_\_\_

**43. Is German your native language?**

- yes                       no                       don't know

**43a. If not: If German is not your native language, how do you assess your knowledge of the German language?**

- very good         good         fair                       poor  
 can't assess



**44. What type of vocational training do you have?**

**Which items apply to you?**

**If you are still in vocational training, please state so in G or H. For pupils without vocational training, please mark A. (Multiple answers possible.)**

- A. I have no vocational qualification and I am not currently in vocational training.
- B. I have completed an in-company training or vocational school.
- C. I completed a vocational qualification from a technical school, master school, engineering school, vocational academy or professional academy.
- D. I have a higher technical college qualification.
- E. I have a university degree.
- F. I have a different type of vocational qualification.
- G. I am still in vocational training (apprentice, trainee, in-company training/ vocational school).
- H. I am a student.

**45. To which group belongs the profession you currently perform or performed at last?**

**(please fill in also when receiving pension or being unemployed)**

- I have never been employed/working.
  
- a self-employed farmer / farmer in a cooperative society (including family worker)
- b academic in liberal profession
- c self-employed in trade, commerce, craft, industry and other...  
civil servant / judge / professional soldier...
  - d in lower or intermediate service
  - e in upper intermediate service
  - f in higher service
- employee...
  - g with working activity under direction
  - h with independent performance in responsible position
  - i with extensive management responsibilities
- worker, namely...
  - k unskilled / semi-skilled
  - l craftsman / craftswoman
  - m foreman, group leader / master, overseer, work team leader
- n in vocational training / school-college / academic studies/ apprenticeship
- o federal voluntary service, VSY (voluntary social year)

**46. How many persons are permanently living in your household, please count yourself as well? Please include all children living in the household.**

\_\_\_\_\_ children (under 18 years of age) \_\_\_\_\_ adults (all persons over 18 years of age)

**47. What is the total monthly net income of your household, counted from all persons who derive income?**

It is meant the sum of wages, salary, income from self-employment, pension, each after discounting taxes and social security contributions. Please count as well income from public benefit and state aid, income from letting, leasing, housing support, child benefit and other income.

- less than 500 Euro
- 500 up to 1.000 Euro
- 1.000 up to 1.500 Euro
- 1.500 up to 2.000 Euro
- 2.000 up to 2.500 Euro
- 2.500 up to 3.000 Euro
- 3.000 up to 4.000 Euro
- 4.000 up to 5.000 Euro
- 5.000 Euro and more

**48. On what type of health issues have you looked for information within the last 12 months? (please mark all applicable items!)**

- diseases
- treatments
- hospitals (addresses, admission procedure, waiting times, quality)
- doctors (addresses, waiting times, quality, specialty practices)
- preventive measures (for example cancer prevention, smoking cessation, change of diet)
- alternative medicine
- health care insurance
- legal assistance for medical malpractice
- other
- Did not look for any health issues.

**Thank you very much for your participation.**
